# Supplementary material
Source: Research Square preprint supplement (doi:10.21203/rs.3.rs-10136034/v1)
Supplement: Supplementary file 1 [file 1776e814c4267b5958cc19fd.docx]

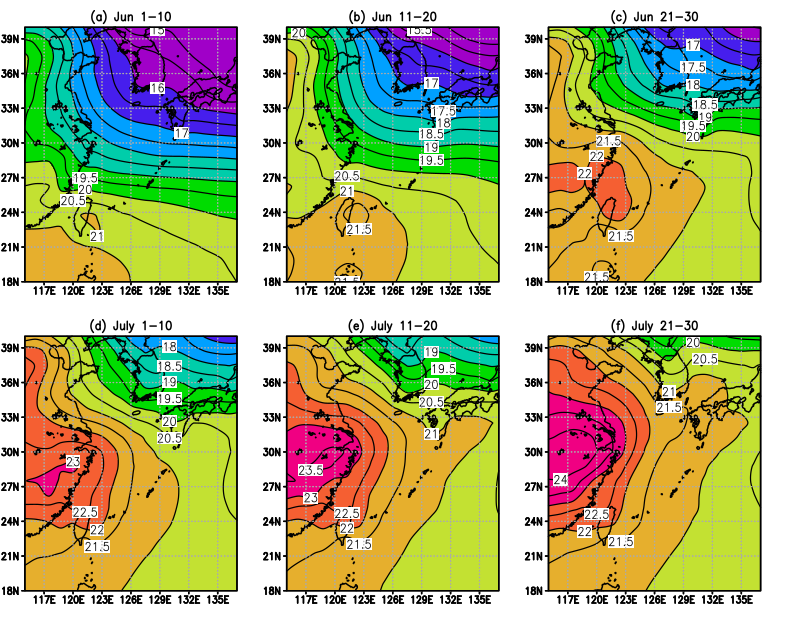


**Fig. S1** Climatology (1989-2018) of temperature () at 900 hPa during (a) 1-10 June, (b) 11-20 June, (c) 21-30 June, (d) 1-10 July, (e) 11-20 July, and (f) 21-30 July.


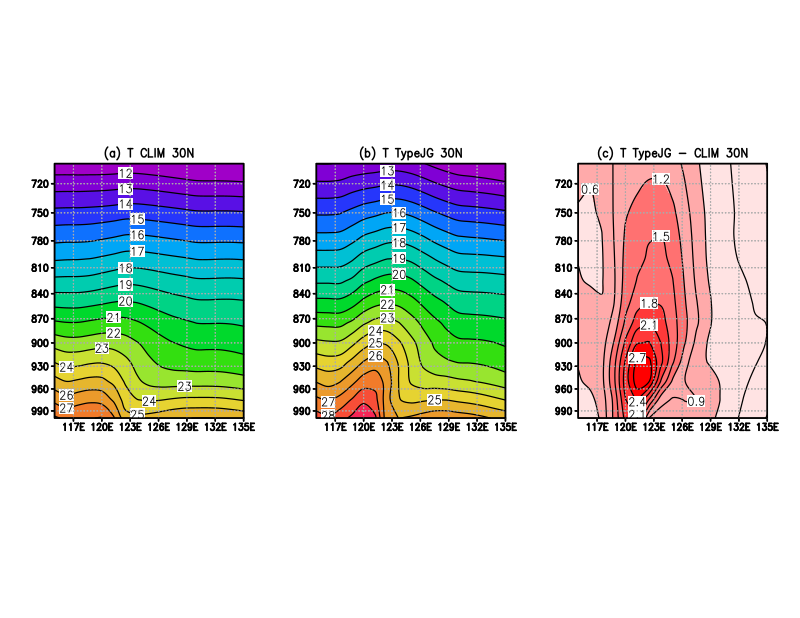


**Fig. S2**.Longitude-height (hPa) section of temperature along . (a) Average during 21 June-20 July for 1989-2018 and (b) average of the Type-JG cases during the same period. (c) Difference between the values in (a) and (b). The criterion used to select the cases is described in the text.
